# Supplementary material for: Nonlinear plasmon-exciton coupling enhances sum-frequency generation from a hybrid metal/semiconductor nanostructure
Source: PubMed Central journal article supplement (PMC7081225; doi:10.1038/s41467-020-15232-w), 2020-03-19
Supplement: 41467_2020_15232_MOESM5_ESM.pdf [file 41467_2020_15232_MOESM5_ESM.pdf]

## Description of Additional Supplementary Files

**Title:** Supplementary Movie 1

**Description:** Inter-pulse time delay dependent microscopic photoelectron emission images for the gold nanosponge shown in Figure 2.

**Title:** Supplementary Movie 2

**Description:** Inter-pulse time delay dependent microscopic photoelectron emission images for other gold nanosponges.
